# Supplementary material
Source: PubMed Central journal article supplement (PMC8788745)
Supplement: aem.01707-21-s0001.pdf [file aem.01707-21-s0001.pdf]

1 Supplemental Tables and Figures

2 **Figure S1.** Phylogenetic relatedness of the unique *B. pseudocatenulatum* allelic profiles as  
3 determined by multilocus sequence typing. Evolutionary history was inferred using the  
4 Minimum Evolution method, followed by 1000 bootstrap replicates.

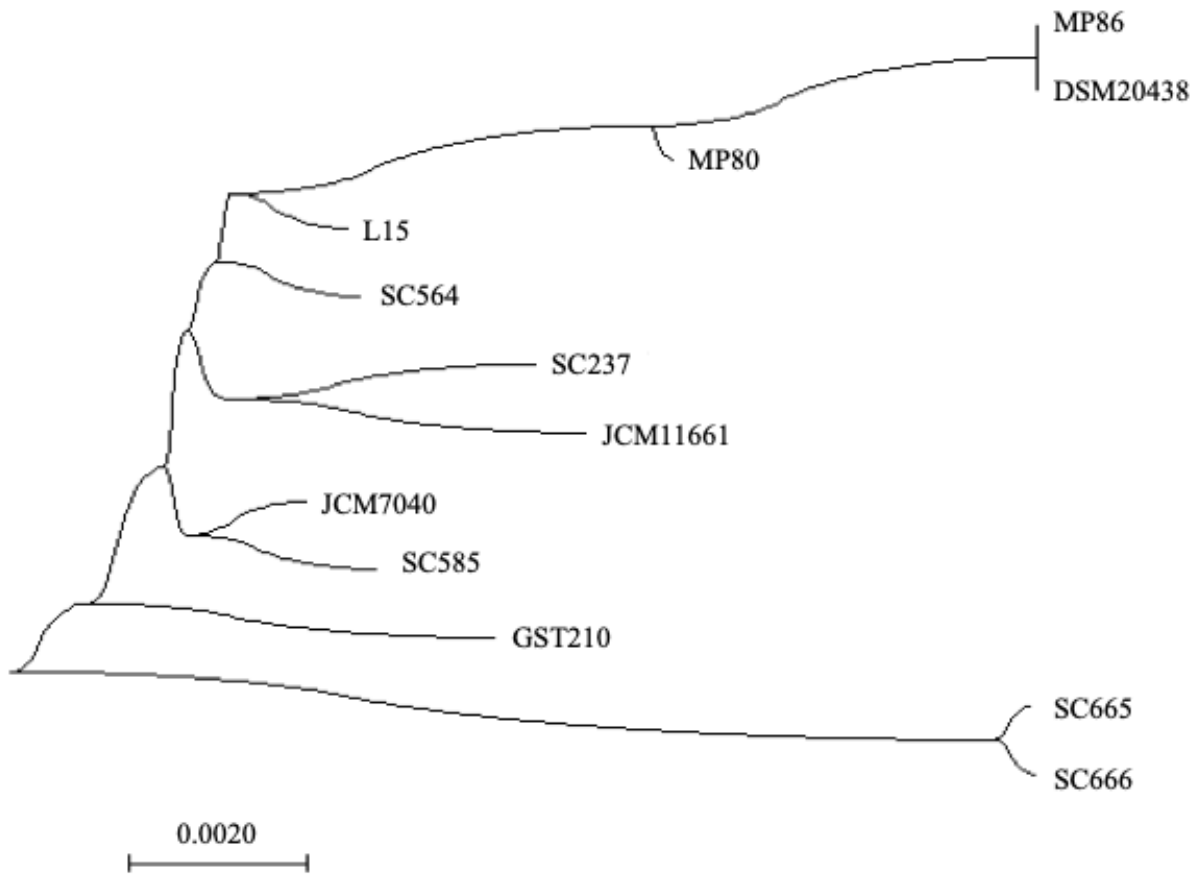

5

6

7 **Table S1.** Glycoprofiling of consumed HMOs by *B. pseudocatenulatum* isolates (n = 12) achieved at 96 h on 2% (w/v) pooled human  
8 milk oligosaccharides. Percent consumption was calculated as the difference in HMO structure abundance at 96 h relative to 0 h.  
9 Negative values represent lack of consumption. *B. pseudocatenulatum* strains (SC237, SC564, SC585, SC665, SC566, MP80, MP86,  
10 JCM7040, JCM11661, GST210, and L15), *B. longum* subsp. *infantis* ATCC15697, *B. animalis* subsp. *lactis* ATCC27536. HMOs: 2'-  
11 fucosyllactose (2'-FL), Lactodifucotetraose (LDFT), Lacto-*N*-tetraose (LNT), Lacto-*N*-neotetraose (LNnT), Lacto-*N*-fucopentaose  
12 type I, II, and III (LNFP I, II, and III), and Lacto-*N*-difucohexaose type I and II (LNDFH I and II), Monofucosyllacto-*N*-hexaose  
13 (MFLNH I and III), Difucosyl-para-lacto-*N*-hexose type II (DFpLNH II), Difucosyllacto-*N*-hexose type B and A (DFLNH B and A),  
14 Trifucosyllacto-*N*-hexose (TFLNH).

|         | 2'FL         | LDFT          | LNT/<br>LNnT | LNFP II      | LNFP I/<br>LNFP III | LNDFH I/<br>LNDFH II | MFLNH III/<br>MFLNH I | DFpLNH II | DFLNH B | DFLNH A | TFLNH   |
|---------|--------------|---------------|--------------|--------------|---------------------|----------------------|-----------------------|-----------|---------|---------|---------|
| SC237   | -50.97       | <b>40.20</b>  | -24.39       | <b>60.45</b> | -29.79              | -62.03               | -32.65                | -49.35    | -34.07  | -34.38  | -35.78  |
| SC564   | -52.28       | <b>35.28</b>  | <b>96.42</b> | <b>4.78</b>  | -35.83              | -54.49               | -45.75                | -180.84   | -102.09 | -61.89  | -93.66  |
| SC585   | <b>98.13</b> | <b>100.00</b> | -19.33       | -42.01       | <b>85.01</b>        | -49.08               | -37.62                | -47.89    | -28.23  | -34.64  | -33.05  |
| SC665   | -68.27       | <b>25.99</b>  | <b>95.29</b> | -89.16       | -38.08              | -79.63               | -41.15                | -233.38   | -126.05 | -85.21  | -108.53 |
| SC666   | -48.92       | <b>37.79</b>  | <b>95.70</b> | <b>61.67</b> | -23.75              | -58.32               | -30.68                | -47.58    | -77.77  | -49.31  | -67.83  |
| MP80    | <b>98.07</b> | <b>100.00</b> | <b>96.68</b> | <b>17.10</b> | <b>55.96</b>        | <b>55.24</b>         | -30.88                | -235.12   | -78.13  | -27.92  | -74.32  |
| MP86    | <b>97.94</b> | <b>100.00</b> | <b>95.76</b> | -116.82      | <b>81.09</b>        | -78.95               | -55.19                | -169.11   | -114.39 | -31.75  | -93.60  |
| JCM7040 | <b>97.33</b> | <b>100.00</b> | <b>95.57</b> | -74.52       | <b>82.27</b>        | -49.56               | -54.60                | -150.45   | -94.97  | -39.63  | -101.08 |

|           |              |              |              |               |               |               |               |               |               |               |               |
|-----------|--------------|--------------|--------------|---------------|---------------|---------------|---------------|---------------|---------------|---------------|---------------|
| JCM11661  | <b>21.58</b> | <b>26.97</b> | <b>95.21</b> | <b>27.50</b>  | -22.74        | -102.34       | -64.97        | -85.56        | -121.30       | -65.04        | -121.91       |
| GST210    | -22.50       | <b>47.07</b> | <b>96.60</b> | <b>32.21</b>  | <b>7.37</b>   | -26.73        | -39.67        | -37.96        | -50.23        | -25.36        | -54.90        |
| L15       | -47.61       | <b>38.73</b> | -20.94       | -30.40        | -19.36        | -52.28        | -16.34        | -38.93        | -25.05        | -36.61        | -22.18        |
| DSM20438  | <b>97.54</b> | <b>99.24</b> | <b>94.71</b> | -44.71        | <b>80.55</b>  | -104.66       | -42.73        | -123.42       | -109.21       | -68.45        | -101.22       |
| ATCC15697 | -59.87       | <b>12.06</b> | <b>99.22</b> | <b>100.00</b> |
| ATCC27536 | -23.23       | <b>35.46</b> | -13.20       | <b>9.65</b>   | -23.48        | -26.16        | -31.60        | -49.12        | -20.08        | -37.89        | -35.40        |

---

16 **Table S2.** Summary of *B. pseudocatenulatum* genomes.

17

|                        | SC585   | MP80    | JCM7040 | JCM11661 | GST210  | L15     | DSM20438 <sup>a</sup> |
|------------------------|---------|---------|---------|----------|---------|---------|-----------------------|
| Whole Genome Size (bp) | 2252718 | 2356572 | 2282098 | 2262265  | 2172804 | 2237466 | 2323752               |
| Number of Contigs      | 124     | 2       | 131     | 110      | 111     | 90      | 1                     |
| Shortest Contig (bp)   | 207     | 37424   | 203     | 191      | 200     | 200     | NA                    |
| Longest Contig (bp)    | 174712  | 2319148 | 181319  | 194473   | 174301  | 183109  | 2323752               |
| Annotated Gene Count   | 1873    | 1942    | 1910    | 1963     | 1852    | 1872    | 1892                  |
| GC Content (%)         | 56.2    | 56.4    | 56.0    | 56.6     | 56.3    | 56.7    | 56.4                  |

a: Information obtained from *B. pseudocatenulatum* DSM20438's publicly available genome (Genbank Accession:

AP012330). NA: not available

18 **Table S3.** Genome accession numbers for strain homology analysis in Figure 4. NCBI accession  
 19 numbers begin with GCA while IMG/JGI Analysis IDs begin with Ga.

| Species                                 | Strain          | Accession       |
|-----------------------------------------|-----------------|-----------------|
| <i>B. animalis</i> subsp. <i>lactis</i> | ATCC 27673      | GCA_000471945.1 |
| <i>B. kashiwanohense</i>                | PV20-2          | GCA_000800455.1 |
| <i>B. longum</i> subsp. <i>infantis</i> | ATCC 15697      | GCA_000020425.1 |
| <i>B. longum</i> subsp. <i>longum</i>   | SC596           | Ga0009797       |
| <i>B. pseudocatenulatum</i>             | 12              | GCA_003952825.1 |
| <i>B. pseudocatenulatum</i>             | 121.5           | GCA_001576885.1 |
| <i>B. pseudocatenulatum</i>             | 1896B           | GCA_002075945.1 |
| <i>B. pseudocatenulatum</i>             | 1E              | GCA_002271255.1 |
| <i>B. pseudocatenulatum</i>             | 2789STDY5834840 | GCA_001405035.1 |
| <i>B. pseudocatenulatum</i>             | AF02-36-1       | GCA_003466105.1 |
| <i>B. pseudocatenulatum</i>             | AF03-28         | GCA_003465775.1 |
| <i>B. pseudocatenulatum</i>             | AF11-18         | GCA_003465135.1 |
| <i>B. pseudocatenulatum</i>             | AF12-10-6.0     | GCA_003465065.1 |
| <i>B. pseudocatenulatum</i>             | AF12-8A-LB      | GCA_003465385.1 |
| <i>B. pseudocatenulatum</i>             | AF12-8LB-d      | GCA_003464925.1 |
| <i>B. pseudocatenulatum</i>             | AF17-20AC       | GCA_003460425.1 |
| <i>B. pseudocatenulatum</i>             | AF18-2AC        | GCA_003459865.1 |
| <i>B. pseudocatenulatum</i>             | AF20-20AC       | GCA_003459475.1 |
| <i>B. pseudocatenulatum</i>             | AF26-1          | GCA_003458965.1 |
| <i>B. pseudocatenulatum</i>             | AF36-12AT       | GCA_003474835.1 |
| <i>B. pseudocatenulatum</i>             | AF41-3MH        | GCA_003474525.1 |
| <i>B. pseudocatenulatum</i>             | AF45-10BH       | GCA_003474015.1 |
| <i>B. pseudocatenulatum</i>             | AM08-2          | GCA_003472725.1 |
| <i>B. pseudocatenulatum</i>             | AM08-25         | GCA_003472685.1 |
| <i>B. pseudocatenulatum</i>             | AM10-2          | GCA_003472575.1 |
| <i>B. pseudocatenulatum</i>             | AM10-24         | GCA_003472545.1 |
| <i>B. pseudocatenulatum</i>             | AM11-10         | GCA_003472415.1 |
| <i>B. pseudocatenulatum</i>             | AM13-2          | GCA_003473115.1 |
| <i>B. pseudocatenulatum</i>             | AM13-8          | GCA_003473025.1 |
| <i>B. pseudocatenulatum</i>             | AM18-42         | GCA_003471505.1 |
| <i>B. pseudocatenulatum</i>             | AM19-19         | GCA_003470545.1 |
| <i>B. pseudocatenulatum</i>             | AM20-1          | GCA_003471415.1 |
| <i>B. pseudocatenulatum</i>             | AM20-6          | GCA_003471325.1 |
| <i>B. pseudocatenulatum</i>             | AM20-9-6.0      | GCA_003471295.1 |
| <i>B. pseudocatenulatum</i>             | AM26-14LB       | GCA_003470125.1 |
| <i>B. pseudocatenulatum</i>             | AM33-6          | GCA_003468555.1 |

|                      |            |                 |
|----------------------|------------|-----------------|
| B. pseudocatenulatum | AM36-2AC   | GCA_003467785.1 |
| B. pseudocatenulatum | AM36-5BH   | GCA_003467755.1 |
| B. pseudocatenulatum | AM38-8     | GCA_003467515.1 |
| B. pseudocatenulatum | AM43-10    | GCA_003467065.1 |
| B. pseudocatenulatum | ca_0067    | GCA_004167565.1 |
| B. pseudocatenulatum | CA-05      | GCA_001685965.1 |
| B. pseudocatenulatum | CA-B29     | GCA_001685985.1 |
| B. pseudocatenulatum | CA-C29     | GCA_001686005.1 |
| B. pseudocatenulatum | CA-K29a    | GCA_001686045.1 |
| B. pseudocatenulatum | CA-K29b    | GCA_001686065.1 |
| B. pseudocatenulatum | CECT 7765  | GCA_000940535.1 |
| B. pseudocatenulatum | CF01-1     | GCA_003463615.1 |
| B. pseudocatenulatum | D2CA       | Ga0009934       |
| B. pseudocatenulatum | DSM 20438  | GCA_001025215.1 |
| B. pseudocatenulatum | GST 210    | Ga0064498       |
| B. pseudocatenulatum | IPLA 36007 | GCA_000708005.1 |
| B. pseudocatenulatum | JCM 11661  | Ga0064497       |
| B. pseudocatenulatum | JCM 7040   | Ga0024098       |
| B. pseudocatenulatum | L15        | Ga0064499       |
| B. pseudocatenulatum | MP80       | Ga0224696       |
| B. pseudocatenulatum | OF01-12    | GCA_003463505.1 |
| B. pseudocatenulatum | OF01-2     | GCA_003463455.1 |
| B. pseudocatenulatum | OF01-21AC  | GCA_003463265.1 |
| B. pseudocatenulatum | OF01-8     | GCA_003463425.1 |
| B. pseudocatenulatum | OF05-12    | GCA_003439655.1 |
| B. pseudocatenulatum | OM05-2     | GCA_003438405.1 |
| B. pseudocatenulatum | OM10-8     | GCA_003438015.1 |
| B. pseudocatenulatum | SC585      | Ga0064049       |
| B. pseudocatenulatum | TF05-19AC  | GCA_003437835.1 |
| B. pseudocatenulatum | TF05-2AC   | GCA_003437825.1 |
| B. pseudocatenulatum | TF07-23    | GCA_003437155.1 |
| B. pseudocatenulatum | TF07-45    | GCA_003437075.1 |
| B. pseudocatenulatum | TF08-3AT   | GCA_003436955.1 |
| B. pseudocatenulatum | TM01-4     | GCA_003436675.1 |
| B. pseudocatenulatum | TM04-13    | GCA_003436545.1 |
| B. pseudocatenulatum | TM05-11    | GCA_003437435.1 |
| B. pseudocatenulatum | TM07-3AT   | GCA_003436315.1 |
| B. pseudocatenulatum | TM08-2     | GCA_003436105.1 |
| B. pseudocatenulatum | TM10-1     | GCA_003436025.1 |

21 **Figure S2.** Relative expression of putative HMO utilization genes. *B. pseudocatenulatum*  
22 MP80's SBP (Ga0224696\_111933),  $\alpha$ -fucosidase GH29 (Ga0224696\_111927), and  $\alpha$ -fucosidase  
23 GH95 (Ga0224696\_111926) and *B. pseudocatenulatum* SC585's SBP (Ga0064049\_111418) and  
24  $\alpha$ -fucosidase GH95 (Ga0064049\_111413) when grown on 2% 2'-fucosyllactose. Expression is in  
25 fold-change relative to growth on 2% glucose. Error bars represent standard error of fold change.

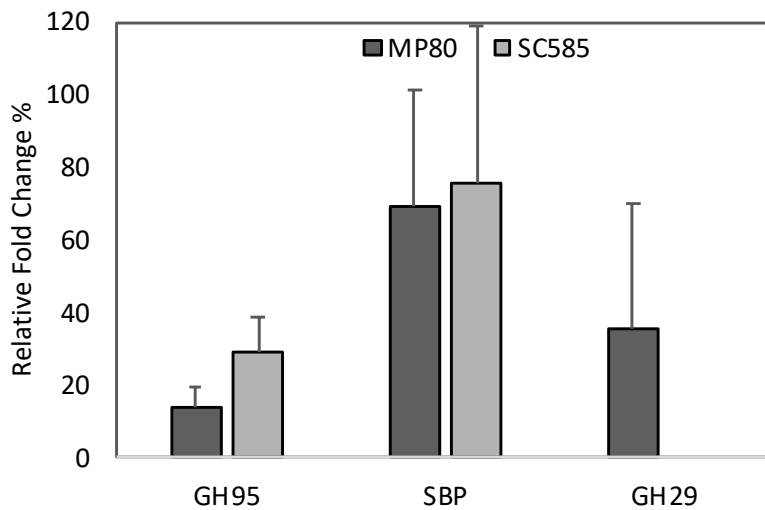

27 **Table S4:** Binding of the fucosidase cluster solute-binding protein from *B. pseudocatenuatum*  
 28 MP80 to various human milk oligosaccharides.

| Binding level | MW (Da) | Common name                         | Structure                                                                                                                                                                                                                 |
|---------------|---------|-------------------------------------|---------------------------------------------------------------------------------------------------------------------------------------------------------------------------------------------------------------------------|
| High          | 488.17  | 2'-fucosyllactose                   | <b><math>\alpha</math>-L-Fuc-(1,2)-<math>\beta</math>-D-Gal-(1,4)-<math>\beta</math>-D-Glc</b>                                                                                                                            |
|               | 488.17  | 3-fucosyllactose                    | <b><math>\beta</math>-D-Gal-(1,4)-[<math>\alpha</math>-L-Fuc-(1,3)]-<math>\beta</math>-D-Glc</b>                                                                                                                          |
| Medium        | 633.21  | 6'-sialyllactose                    | $\alpha$ -D-Neu5Ac-(2,6)- $\beta$ -D-Gal-(1,4)- $\beta$ -D-Glc                                                                                                                                                            |
|               | 634.23  | Difucosyllactose                    | <b><math>\alpha</math>-L-Fuc-(1,2)-<math>\beta</math>-D-Gal-(1,4)-[<math>\alpha</math>-L-Fuc-(1,3)]-<math>\beta</math>-D-Glc</b>                                                                                          |
|               | 707.25  | Lacto- <i>N</i> -tetraose           | $\beta$ -D-Gal-(1,3)- $\beta$ -D-GlcNAc-(1,3)- $\beta$ -D-Gal-(1,4)- $\beta$ -D-Glc                                                                                                                                       |
|               | 707.25  | Lacto- <i>N</i> -neotetraose        | $\beta$ -D-Gal-(1,4)- $\beta$ -D-GlcNAc-(1,3)- $\beta$ -D-Gal-(1,4)- $\beta$ -D-Glc                                                                                                                                       |
|               | 853.31  | Lacto- <i>N</i> -fucopentaose I     | <b><math>\alpha</math>-L-Fuc-(1,2)-<math>\beta</math>-D-Gal-(1,3)-<math>\beta</math>-D-GlcNAc-(1,3)-<math>\beta</math>-D-Gal-(1,4)-<math>\beta</math>-D-Glc</b>                                                           |
|               | 853.31  | Lacto- <i>N</i> -fucopentaose II    | $\beta$ -D-Gal-(1,3)-[ <b><math>\alpha</math>-L-Fuc-(1,4)</b> ]- $\beta$ -D-GlcNAc-(1,3)- $\beta$ -D-Gal-(1,4)- $\beta$ -D-Glc                                                                                            |
|               | 853.31  | Lacto- <i>N</i> -fucopentaose III   | $\beta$ -D-Gal-(1,4)-[ <b><math>\alpha</math>-L-Fuc-(1,3)</b> ]- $\beta$ -D-GlcNAc-(1,3)- $\beta$ -D-Gal-(1,4)- $\beta$ -D-Glc                                                                                            |
|               | 853.31  | Lacto- <i>N</i> -neofucopentaose V  | $\beta$ -D-Gal-(1,3)- $\beta$ -D-GlcNAc-(1,3)- $\beta$ -D-Gal-(1,4)-[ <b><math>\alpha</math>-L-Fuc-(1,3)</b> ]- $\beta$ -D-Glc                                                                                            |
|               | 853.31  | Lacto- <i>N</i> -neofucopentaose    | $\beta$ -D-Gal-(1,4)- $\beta$ -D-GlcNAc-(1,3)- $\beta$ -D-Gal-(1,4)[ <b><math>\alpha</math>-L-Fuc-(1,3)</b> ]- $\beta$ -D-Glc                                                                                             |
|               | 998.34  | Sialyllacto- <i>N</i> -tetraose B   | $\alpha$ -D-Neu5Ac-(2,6)-[ $\beta$ -D-Gal-(1,3)]- $\beta$ -D-GlcNAc-(1,3)- $\beta$ -D-Gal-(1,4)- $\beta$ -D-Glc                                                                                                           |
|               | 998.34  | Sialyllacto- <i>N</i> -tetraose C   | $\alpha$ -D-Neu5Ac-(2,6)- $\beta$ -D-Gal-(1,4)- $\beta$ -D-GlcNAc-(1,3)- $\beta$ -D-Gal-(1,4)- $\beta$ -D-Glc                                                                                                             |
|               | 998.34  | Sialyllacto- <i>N</i> -tetraose D   | $\alpha$ -D-Neu5Ac-(2,3)- $\beta$ -D-Gal-(1,4)- $\beta$ -D-GlcNAc-(1,3)- $\beta$ -D-Gal-(1,4)- $\beta$ -D-Glc                                                                                                             |
|               | 999.36  | Lacto- <i>N</i> -difucohexaose I    | <b><math>\alpha</math>-L-Fuc-(1,2)-<math>\beta</math>-D-Gal-(1,3)-[<math>\alpha</math>-L-Fuc-(1,4)]-<math>\beta</math>-D-GlcNAc-(1,3)-<math>\beta</math>-D-Gal-(1,4)-<math>\beta</math>-D-Glc</b>                         |
|               | 999.36  | Lacto- <i>N</i> -difucohexaose II   | $\beta$ -D-Gal-(1,3)-[ <b><math>\alpha</math>-L-Fuc-(1,4)</b> ]- $\beta$ -D-GlcNAc-(1,3)- $\beta$ -D-Gal-(1,4)-[ <b><math>\alpha</math>-L-Fuc-(1,3)</b> ]- $\beta$ -D-Glc                                                 |
|               | 999.36  | Lacto- <i>N</i> -neodifucohexaose   | $\beta$ -D-Gal-(1,4)-[ <b><math>\alpha</math>-L-Fuc-(1,3)</b> ]- $\beta$ -D-GlcNAc-(1,3)- $\beta$ -D-Gal-(1,4)-[ <b><math>\alpha</math>-L-Fuc-(1,3)</b> ]- $\beta$ -D-Glc                                                 |
|               | 1072.38 | Para-lacto- <i>N</i> -neohexaose    | $\beta$ -D-Gal-(1,4)- $\beta$ -D-GlcNAc-(1,3)- $\beta$ -D-Gal-(1,4)- $\beta$ -D-GlcNAc-(1,3)- $\beta$ -D-Gal-(1,4)- $\beta$ -D-Glc                                                                                        |
|               | 1072.38 | Lacto- <i>N</i> -neohexaose         | $\beta$ -D-Gal-(1,4)- $\beta$ -D-GlcNAc-(1,6)-[ $\beta$ -D-Gal-(1,4)- $\beta$ -D-GlcNAc-(1,3)]- $\beta$ -D-Glc-(1,4)-Glc                                                                                                  |
|               | 1364.50 | Difucosyllacto- <i>N</i> -hexaose A | $\beta$ -D-Gal-(1,4)-[ <b><math>\alpha</math>-L-Fuc-(1,3)</b> ]- $\beta$ -D-GlcNAc-(1,6)-[ <b><math>\alpha</math>-L-Fuc-(1,2)</b> ]- $\beta$ -D-Gal-(1,3)- $\beta$ -D-GlcNAc-(1,3)]- $\beta$ -D-Gal-(1,4)- $\beta$ -D-Glc |



|                  |         |                                             |                                                                                                                                                                                      |
|------------------|---------|---------------------------------------------|--------------------------------------------------------------------------------------------------------------------------------------------------------------------------------------|
|                  | 1364.50 | Difucosyl-paralacto- <i>N</i> -hexaose      | $\beta$ -D-Gal-(1,3)-[ $\alpha$ -L-Fuc-(1,4)]- $\beta$ -D-GlcNAc-(1,3)- $\beta$ -D-Gal-(1,4)-[ $\alpha$ -L-Fuc-(1,3)]- $\beta$ -D-GlcNAc-(1,3)- $\beta$ -D-Gal-(1,4)- $\beta$ -D-Glc |
|                  | 545.48  | Lacto- <i>N</i> -triose                     | $\beta$ -D-GlcNAc-(1,3)- $\beta$ -D-Gal(1,4)- $\beta$ -D-Glc                                                                                                                         |
|                  | 691.62  | Blood group A antigen tetraose type 5       | $\alpha$ -D-GalNAc-(1,3)-[ $\alpha$ -L-Fuc-(1,2)]- $\beta$ -D-Gal-(1,4)- $\beta$ -D-Glc                                                                                              |
|                  | 1056.96 | Blood group A antigen hexaose type 1        | $\alpha$ -D-GalNAc-(1,3)-[ $\alpha$ -L-Fuc-(1,2)]- $\beta$ -D-Gal-(1,3)- $\beta$ -GlcNAc(1,3)- $\beta$ -D-Gal(1,4)- $\beta$ -D-Glc                                                   |
|                  | 633.21  | 3'-sialyllactose                            | $\alpha$ -D-Neu5Ac-(2,3)- $\beta$ -D-Gal-(1,4)- $\beta$ -D-Glc                                                                                                                       |
|                  | 779.27  | 3'-sialyl-3'-fucosyllactose                 | $\alpha$ -D-Neu5Ac-(2,3)- $\beta$ -D-Gal-(1,4)-[ $\alpha$ -L-Fuc-(1,3)]- $\beta$ -D-Glc                                                                                              |
|                  | 998.34  | Sialyllacto- <i>N</i> -tetraose a           | $\alpha$ -D-Neu5Ac-(2,3)- $\beta$ -D-Gal-(1,3)- $\beta$ -D-GlcNAc-(1,3)- $\beta$ -D-Gal-(1,4)- $\beta$ -D-Glc                                                                        |
|                  | 1144.40 | Sialyl monofucosyllacto- <i>N</i> -tetraose | $\alpha$ -D-Neu5Ac-(2,3)- $\beta$ -D-Gal-(1,3)-[ $\alpha$ -L-Fuc-(1,4)]- $\beta$ -D-GlcNAc-(1,3)- $\beta$ -D-Gal-(1,4)- $\beta$ -D-Glc                                               |
| Low / no binding | 1144.40 | Sialyl-lacto- <i>N</i> -fucopentaose V      | $\alpha$ -L-Fuc-(1,2)- $\beta$ -D-Gal-(1,3)-[ $\alpha$ -D-Neu5Ac-(2,6)]- $\beta$ -D-GlcNAc-(1,3)- $\beta$ -D-Gal-(1,4)- $\beta$ -D-Glc                                               |
|                  | 1289.44 | Disialyllacto- <i>N</i> -tetraose           | $\alpha$ -D-Neu5Ac-(2,3)- $\beta$ -D-Gal-(1,3)-[ $\alpha$ -D-Neu5Ac-(2,6)]- $\beta$ -D-GlcNAc-(1,3)- $\beta$ -D-Gal-(1,4)- $\beta$ -D-Glc                                            |
|                  | 1438.29 | Lacto- <i>N</i> -neooctaose                 | $\beta$ -D-Gal-(1,4)- $\beta$ -D-GlcNAc-(1,3)- $\beta$ -D-Gal(1,4)- $\beta$ -D-GlcNAc(1,3)- $\beta$ -D-Gal(1,4)- $\beta$ -D-GlcNAc(1,3)- $\beta$ -D-Gal(1,4)- $\beta$ -D-Glc         |

30 **Table S5:** Binding of the fucosidase cluster solute-binding protein from *B. pseudocatenuatum*  
 31 SC585 to various human milk oligosaccharides.

| Binding level | MW (Da) | Common name                        | Structure                                                                                                                                                                 |
|---------------|---------|------------------------------------|---------------------------------------------------------------------------------------------------------------------------------------------------------------------------|
| High          | 488.17  | 2'-fucosyllactose                  | <b><math>\alpha</math>-L-Fuc-(1→2)</b> - $\beta$ -D-Gal-(1→4)- $\beta$ -D-Glc                                                                                             |
|               | 488.17  | 3-fucosyllactose                   | $\beta$ -D-Gal-(1→4)-[ <b><math>\alpha</math>-L-Fuc-(1→3)</b> ]- $\beta$ -D-Glc                                                                                           |
|               | 633.21  | 3'-sialyllactose                   | $\alpha$ -D-Neu5Ac-(2→3)- $\beta$ -D-Gal-(1→4)- $\beta$ -D-Glc                                                                                                            |
|               | 633.21  | 6'-sialyllactose                   | $\alpha$ -D-Neu5Ac-(2→6)- $\beta$ -D-Gal-(1→4)- $\beta$ -D-Glc                                                                                                            |
|               | 634.23  | Difucosyllactose                   | <b><math>\alpha</math>-L-Fuc-(1→2)</b> - $\beta$ -D-Gal-(1→4)-[ <b><math>\alpha</math>-L-Fuc-(1→3)</b> ]- $\beta$ -D-Glc                                                  |
|               | 707.25  | Lacto- <i>N</i> -tetraose          | $\beta$ -D-Gal-(1→3)- $\beta$ -D-GlcNAc-(1→3)- $\beta$ -D-Gal-(1→4)- $\beta$ -D-Glc                                                                                       |
|               | 707.25  | Lacto- <i>N</i> -neotetraose       | $\beta$ -D-Gal-(1→4)- $\beta$ -D-GlcNAc-(1→3)- $\beta$ -D-Gal-(1→4)- $\beta$ -D-Glc                                                                                       |
|               | 779.27  | 3'-sialyl-3'-fucosyllactose        | $\alpha$ -D-Neu5Ac-(2→3)- $\beta$ -D-Gal-(1→4)-[ <b><math>\alpha</math>-L-Fuc-(1→3)</b> ]- $\beta$ -D-Glc                                                                 |
|               | 853.31  | Lacto- <i>N</i> -fucopentaose I    | <b><math>\alpha</math>-L-Fuc-(1→2)</b> - $\beta$ -D-Gal-(1→3)- $\beta$ -D-GlcNAc-(1→3)- $\beta$ -D-Gal-(1→4)- $\beta$ -D-Glc                                              |
|               | 853.31  | Lacto- <i>N</i> -fucopentaose II   | $\beta$ -D-Gal-(1→3)-[ <b><math>\alpha</math>-L-Fuc-(1→4)</b> ]- $\beta$ -D-GlcNAc-(1→3)- $\beta$ -D-Gal-(1→4)- $\beta$ -D-Glc                                            |
|               | 853.31  | Lacto- <i>N</i> -fucopentaose III  | $\beta$ -D-Gal-(1→4)-[ <b><math>\alpha</math>-L-Fuc-(1→3)</b> ]- $\beta$ -D-GlcNAc-(1→3)- $\beta$ -D-Gal-(1→4)- $\beta$ -D-Glc                                            |
|               | 853.31  | Lacto- <i>N</i> -neofucopentaose V | $\beta$ -D-Gal-(1→3)- $\beta$ -D-GlcNAc-(1→3)- $\beta$ -D-Gal-(1→4)-[ <b><math>\alpha</math>-L-Fuc-(1→3)</b> ]- $\beta$ -D-Glc                                            |
| Medium        | 853.31  | Lacto- <i>N</i> -neofucopentaose   | $\beta$ -D-Gal-(1→4)- $\beta$ -D-GlcNAc-(1→3)- $\beta$ -D-Gal-(1→4)[ <b><math>\alpha</math>-L-Fuc-(1→3)</b> ]- $\beta$ -D-Glc                                             |
|               | 998.34  | Sialyllacto- <i>N</i> -tetraose a  | $\alpha$ -D-Neu5Ac-(2→3)- $\beta$ -D-Gal-(1→3)- $\beta$ -D-GlcNAc-(1→3)- $\beta$ -D-Gal-(1→4)- $\beta$ -D-Glc                                                             |
|               | 998.34  | Sialyllacto- <i>N</i> -tetraose b  | $\alpha$ -D-Neu5Ac-(2→6)-[ $\beta$ -D-Gal-(1→3)]- $\beta$ -D-GlcNAc-(1→3)- $\beta$ -D-Gal-(1→4)- $\beta$ -D-Glc                                                           |
|               | 998.34  | Sialyllacto- <i>N</i> -tetraose c  | $\alpha$ -D-Neu5Ac-(2→6)- $\beta$ -D-Gal-(1→4)- $\beta$ -D-GlcNAc-(1→3)- $\beta$ -D-Gal-(1→4)- $\beta$ -D-Glc                                                             |
|               | 998.34  | Sialyllacto- <i>N</i> -tetraose d  | $\alpha$ -D-Neu5Ac-(2→3)- $\beta$ -D-Gal-(1→4)- $\beta$ -D-GlcNAc-(1→3)- $\beta$ -D-Gal-(1→4)- $\beta$ -D-Glc                                                             |
|               | 999.36  | Lacto- <i>N</i> -difucohexaose I   | <b><math>\alpha</math>-L-Fuc-(1→2)</b> - $\beta$ -D-Gal-(1→3)-[ <b><math>\alpha</math>-L-Fuc-(1→4)</b> ]- $\beta$ -D-GlcNAc-(1→3)- $\beta$ -D-Gal-(1→4)- $\beta$ -D-Glc   |
|               | 999.36  | Lacto- <i>N</i> -difucohexaose II  | $\beta$ -D-Gal-(1→3)-[ <b><math>\alpha</math>-L-Fuc-(1→4)</b> ]- $\beta$ -D-GlcNAc-(1→3)- $\beta$ -D-Gal-(1→4)-[ <b><math>\alpha</math>-L-Fuc-(1→3)</b> ]- $\beta$ -D-Glc |
|               | 999.36  | Lacto- <i>N</i> -neodifucohexaose  | $\beta$ -D-Gal-(1→4)-[ <b><math>\alpha</math>-L-Fuc-(1→3)</b> ]- $\beta$ -D-GlcNAc-(1→3)- $\beta$ -D-Gal-(1→4)-[ <b><math>\alpha</math>-L-Fuc-(1→3)</b> ]- $\beta$ -D-Glc |
|               | 545.20  | Lacto- <i>N</i> -triose            | $\beta$ -D-GlcNAc-(1→3)- $\beta$ -D-Gal(1→4)- $\beta$ -D-Glc                                                                                                              |

|         |                                             |                                                                                                                                                                                       |
|---------|---------------------------------------------|---------------------------------------------------------------------------------------------------------------------------------------------------------------------------------------|
| 691.25  | Blood group A antigen tetraose type 5       | $\alpha$ -D-GalNAc-(1→3)-[ $\alpha$ -L-Fuc-(1→2)]- $\beta$ -D-Gal-(1→4)- $\beta$ -D-Glc                                                                                               |
| 674.24  | 3'-sialyl- <i>N</i> -acetyllactosamine      | $\alpha$ -D-Neu5Ac-(2→3)- $\beta$ -D-Gal-(1→4)- $\beta$ -D-GlcNAc                                                                                                                     |
| 674.24  | 6'-sialyl- <i>N</i> -acetyllactosamine      | $\alpha$ -D-Neu5Ac-(2→6)- $\beta$ -D-Gal-(1→4)- $\beta$ -D-GlcNAc                                                                                                                     |
| 820.30  | 3'-sialyl Lewis A                           | $\alpha$ -D-Neu5Ac-(2→3)- $\beta$ -D-Gal-(1→3)-[ $\alpha$ -L-Fuc-(1→4)]- $\beta$ -D-GlcNAc                                                                                            |
| 1072.38 | Para Lacto- <i>N</i> -neohexaose            | $\beta$ -D-Gal-(1→4)- $\beta$ -D-GlcNAc-(1→3)- $\beta$ -D-Gal-(1→4)- $\beta$ -D-GlcNAc-(1→3)- $\beta$ -D-Gal-(1→4)- $\beta$ -D-Glc                                                    |
| 1072.38 | Lacto- <i>N</i> -neohexaose                 | $\beta$ -D-Gal-(1→4)- $\beta$ -D-GlcNAc-(1→6)-[ $\beta$ -D-Gal-(1→4)- $\beta$ -D-GlcNAc-(1→3)]- $\beta$ -D-Gal-(1→4)- $\beta$ -D-Glc                                                  |
| 1144.40 | Sialyl monofucosyllacto- <i>N</i> -tetraose | $\alpha$ -D-Neu5Ac-(2→3)- $\beta$ -D-Gal-(1→3)-[ $\alpha$ -L-Fuc-(1→4)]- $\beta$ -D-GlcNAc-(1→3)- $\beta$ -D-Gal-(1→4)- $\beta$ -D-Glc                                                |
| 1144.40 | Sialyl-lacto- <i>N</i> -fucopentaose V      | $\alpha$ -L-Fuc-(1→2)- $\beta$ -D-Gal-(1→3)-[ $\alpha$ -D-Neu5Ac-(2→6)]- $\beta$ -D-GlcNAc-(1→3)- $\beta$ -D-Gal-(1→4)- $\beta$ -D-Glc                                                |
| 1289.44 | Disialyllacto- <i>N</i> -tetraose           | $\alpha$ -D-Neu5Ac-(2→3)- $\beta$ -D-Gal-(1→3)-[ $\alpha$ -D-Neu5Ac-(2→6)]- $\beta$ -D-GlcNAc-(1→3)- $\beta$ -D-Gal-(1→4)- $\beta$ -D-Glc                                             |
| 1364.50 | Difucosyllacto- <i>N</i> -hexaose a         | $\beta$ -D-Gal-(1→4)-[ $\alpha$ -L-Fuc-(1→3)]- $\beta$ -D-GlcNAc-(1→6)-[ $\alpha$ -L-Fuc-(1→2)]- $\beta$ -D-Gal-(1→3)- $\beta$ -D-GlcNAc-(1→3)]- $\beta$ -D-Gal-(1→4)- $\beta$ -D-Glc |
| 1364.50 | Difucosyl-para-lacto- <i>N</i> -hexaose II  | $\beta$ -D-Gal-(1→3)-[ $\alpha$ -L-Fuc-(1→4)]- $\beta$ -D-GlcNAc-(1→3)- $\beta$ -D-Gal-(1→4)-[ $\alpha$ -L-Fuc-(1→3)]- $\beta$ -D-GlcNAc-(1→3)- $\beta$ -D-Gal-(1→4)- $\beta$ -D-Glc  |
| 1437.51 | Lacto- <i>N</i> -neooctaose                 | $\beta$ -D-Gal-(1→4)- $\beta$ -D-GlcNAc-(1→3)- $\beta$ -D-Gal-(1→4)- $\beta$ -D-GlcNAc-(1→3)- $\beta$ -D-Gal-(1→4)- $\beta$ -D-GlcNAc-(1→3)- $\beta$ -D-Gal-(1→4)- $\beta$ -D-Glc     |
| 1056.39 | Blood group A antigen hexaose type 1        | $\alpha$ -D-GalNAc-(1→3)-[ $\alpha$ -L-Fuc-(1→2)]- $\beta$ -D-Gal-(1→3)- $\beta$ -D-GlcNAc-(1→3)- $\beta$ -D-Gal-(1→4)- $\beta$ -D-Glc                                                |
| 1202.44 | A-hepta saccharide                          | $\alpha$ -D-GalNAc-(1→3)-[ $\alpha$ -L-Fuc-(1→2)]- $\beta$ -D-Gal-(1→3)-[ $\alpha$ -L-Fuc-(1→4)]- $\beta$ -D-GlcNAc-(1→3)- $\beta$ -D-Gal-(1→4)- $\beta$ -D-Glc                       |
| 1218.44 | Monofucosyllacto- <i>N</i> -hexaose III     | $\beta$ -D-Gal-(1→4)-[ $\alpha$ -L-Fuc-(1→3)]- $\beta$ -D-GlcNAc-(1→6)-[ $\beta$ -D-Gal-(1→3)- $\beta$ -D-GlcNAc-(1→3)]- $\beta$ -D-Gal-(1→4)- $\beta$ -D-Glc                         |
| 1364.50 | Difucosyllacto- <i>N</i> -                  | $\beta$ -D-Gal-(1→4)-[ $\alpha$ -L-Fuc-(1→3)]- $\beta$ -D-                                                                                                                            |

Low/no binding

|         |                                           |                                                                                                                                     |
|---------|-------------------------------------------|-------------------------------------------------------------------------------------------------------------------------------------|
|         | hexaose b                                 | GlcNAc-(1→6)-[β-D-Gal-(1→3)-[α-L-Fuc-(1→4)]-β-D-GlcNAc-(1→3)]-β-D-Gal-(1→4)-β-D-Glc                                                 |
| 1364.50 | Difucosyl-paralacto- <i>N</i> -neohexaose | β-D-Gal-(1→4)-[α-L-Fuc-(1→3)]-β-D-GlcNAc-(1→3)-β-D-Gal-(1→4)-[α-L-Fuc-(1→3)]-D-GlcNAc-(1→3)]-β-D-Gal-(1→4)-β-D-Glc                  |
| 1072.38 | Para Lacto- <i>N</i> -hexaose             | β-D-Gal-(1→3)-β-D-GlcNAc-(1→3)-β-D-Gal-(1→4)-β-D-GlcNAc-(1→3)-β-D-Gal-(1→4)-β-D-Glc                                                 |
| 1510.55 | Trifucosyllacto- <i>N</i> -hexaose a      | β-D-Gal-(1→4)-[α-L-Fuc-(1→3)]-β-D-GlcNAc-(1→6)-[α-L-Fuc-(1→2)-β-D-Gal-(1→3)-[α-L-Fuc-(1→4)]-β-D-GlcNAc-(1→3)]-β-D-Gal-(1→4)-β-D-Glc |

---
